# Supplementary material
Source: PubMed Central journal article supplement (PMC3193228)
Supplement: 1112047108_pnas.1112047108_SI.pdf [file 1112047108_pnas.1112047108_SI.pdf]

# Supporting Information

Benod et al. 10.1073/pnas.1112047108

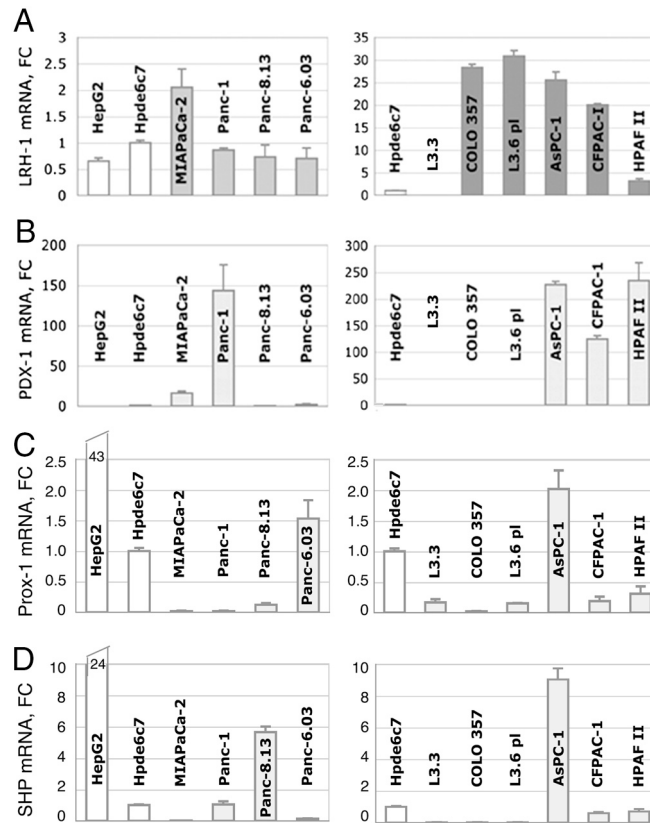

**Fig. S1.** Expression of liver receptor homologue 1 (LRH-1) and its regulators in pancreatic cancer cells. (A) The levels of LRH-1 mRNA in different pancreatic cancer cells. Levels of LRH-1 specific mRNA in pancreatic cancer cell originated from primary and metastatic pancreatic ductal adenocarcinoma tumors (light- and dark-gray bars in the left and right panels, respectively) are shown as fold change (FC) relative to that in nonneoplastic pancreatic ductal epithelial cells Hpde6c7 (control in white). For comparison, the levels of LRH-1 mRNA in hepatocarcinoma cells HepG2 are shown in the left panel. Standard deviations are drawn as black lines. (B–D) Quantitative PCR data indicating the levels of specific mRNA for pancreatic and duodenal homeobox 1 (PDX-1, B), the Prospero homeobox protein 1 (Prox1, C), and the short heterodimer partner (SHP, D) in pancreatic cancer cells. The corresponding levels for each specific mRNA are shown as gray bars, relative to the control (immortalized pancreatic ductal epithelial cells Hpde6c7, indicated).

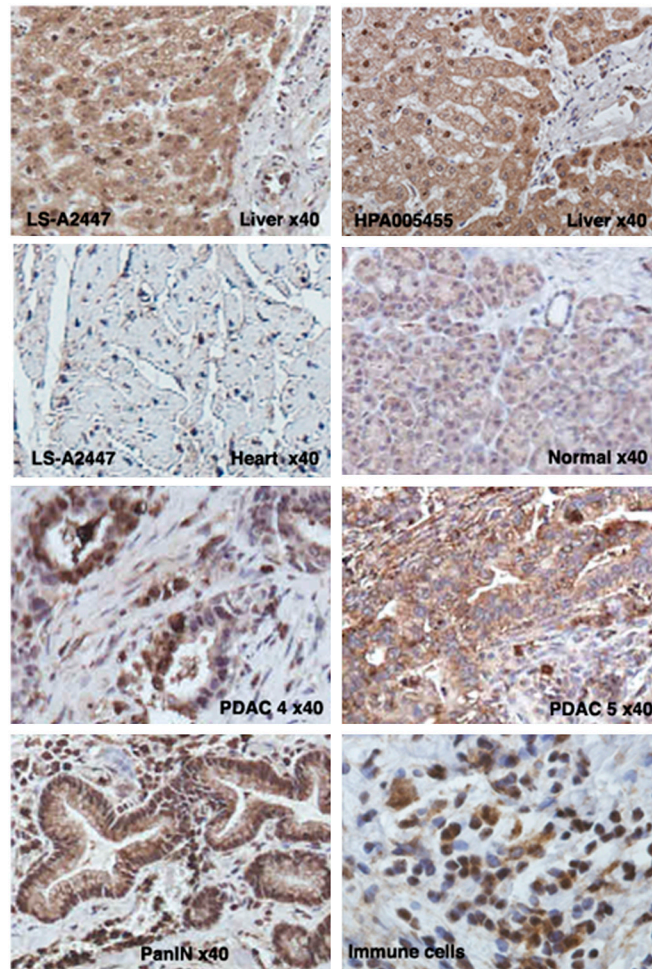

**Fig. S2.** Differential expression of liver receptor homologue 1 (LRH-1) in normal and cancerous pancreas. Shown are representative immunohistochemistry images of human normal (indicated Normal) and neoplastic pancreas [pancreatic ductal adenocarcinoma (PDAC) indicated as PDAC 4–PDAC 5]. The samples were treated with primary antibody LS-A2447 (LifeSpan Biosciences), stained with ImmPACT diaminobenzidine (Vector Labs), and counterstained with hematoxylin; the original magnification ( $\times 40$ ) is specified. The specificity of staining [both for LS-A2447 and HPA005455 (Sigma-Aldrich) antibodies, indicated] was confirmed using positive (liver hepatocytes, with positively stained nuclei and cytoplasm) and negative (liver connective tissue) controls (Liver, indicated). An additional negative control (heart muscle tissue sample; Heart, indicated) showed the absence of unspecific background staining. Weak cytoplasmic and weak-to-moderate punctate nuclear staining is observed for all components of normal exocrine pancreas. In neoplastic cells, elevated levels of LRH-1 protein are observed either in the nuclei (PDAC 4) or in the cytoplasm (PDAC 5) or both. The fibroblasts in the stroma surrounding the neoplastic lesions do not show significant LRH-1 specific staining (PDAC 4), however, many infiltrating immune cells, including lymphocytes and neutrophils, are positively stained for LRH-1 (Immune cells, indicated; original magnification  $\times 40$ ; image is additionally magnified for clarity). Heightened levels of LRH-1 are also observed in pancreatic intraepithelial neoplasia (PanIN) lesions (indicated). We note that, although the receptor quantification in cultured cancer cells did not reveal significant differences in the levels of LRH-1 between nonneoplastic and primary tumor cells (Fig. 1 of the manuscript), the immunohistochemistry (IHC) evaluations of primary PDACs demonstrated apparent increases in the receptor levels in all tested tumor samples (12 PDAC cases, 100%) compared to normal exocrine pancreas (Fig. 2, Fig. S2, and Table S1). A few contributing factors might account for these contradicting data. First, cultured pancreatic cancer cells have been shown to have nonidentical gene expression profiles compared to the surgical PDAC specimens. Second, the control Hpde6c7 cells used for in vitro receptor quantification are not equivalent to normal pancreatic ductal epithelium because these cells are immortalized and thus have a plenitude of genes (including those that control cell renewal and proliferation) activated. As LRH-1 is connected intimately to these processes, modest differences observed between the control and the primary cancer cells might be attributed to a heightened LRH-1 activity in Hpde6c7 cells. In this regard, evaluation of LRH-1 expression in PDAC tumors is superior to the receptor quantification in cultured cancer cells. The IHC analysis of PDACs has an additional advantage of revealing differential LRH-1 expression in various types of neoplastic cells as well as in different cancer cell compartments. Further in-depth studies are needed to reveal possible variations in LRH-1 expression in different subtypes of PDACs. This information might be invaluable for development of pancreatic cancer theranostics. The potential of theranostic strategies for cancer treatments is best exemplified by the success of human epidermal growth factor receptor 2 (HER2)-based diagnostics and the receptor targeting therapies that extend life of many breast cancer patients.
